# Supplementary material
Source: HighWire-hosted journal article supplement (http://ajnr-stage2.highwire.org/highwire/filestream/106829/field_highwire_adjunct_files/0/0956.pdf)
Supplement: 0956.pdf [file 0956.pdf]

**Supplementary Table 1: Comparison of the incidence of AWE and ACE between groups of different coiled intracranial aneurysms with different follow-up intervals (months).**

|                   | ≤6<br>months | 7 to 12<br>months | 13 to 24<br>months | 25 to 48<br>months | 49 to 72<br>months | 73 to 96<br>months | >96<br>months |
|-------------------|--------------|-------------------|--------------------|--------------------|--------------------|--------------------|---------------|
| <b>AWE/ Total</b> | 6/8 (75.0%)  | 4/7 (57.1%)       | 5/10 (50.0%)       | 4/16 (25.0%)       | 3/6 (50.0%)        | 3/6 (50.0%)        | 2/9 (28.6%)   |
| <b>ACE/ Total</b> | 5/8 (62.5%)  | 4/7 (57.1%)       | 4/10 (40.0%)       | 9/16 (56.3%)       | 4/6 (66.7%)        | 3/6 (50.0%)        | 5/9 (71.4%)   |

AWE: Aneurysm wall enhancement, ACE: Aneurysm central enhancement

**Supplementary Table 2: Comparison of the incidence of AWE and ACE between different coiled intracranial aneurysms with and without recanalization with regards to recanalization size in millimetres (mm).**

|                   | 0 mm          | 1 to 3 mm    | 4 to 5 mm     | ≥6 mm         |
|-------------------|---------------|--------------|---------------|---------------|
| <b>AWE/ Total</b> | 6/22 (27.3%)  | 5/20 (25%)   | 10/12 (83.3%) | 6/6 (100%)    |
| <b>p-value</b>    |               | 0.8671       | <b>0.0033</b> | <b>0.0025</b> |
| <b>ACE/ Total</b> | 12/22 (54.6%) | 6/19 (31.6%) | 11/12 (91.7%) | 5/6 (83.3%)   |
| <b>p-value</b>    |               | 0.2452       | 0.0527        | 0.3547        |

AWE: Aneurysm wall enhancement, ACE: Aneurysm central enhancement

**Supplementary Table 3: Comparison of the incidence of AWE and ACE between ruptured and unruptured coiled intracranial aneurysms.**

|            | aSAH (n=27) | No aSAH (=33) | p-value     |
|------------|-------------|---------------|-------------|
| <b>AWE</b> | 8 (13.3%)   | 19 (31.7%)    | <b>0.03</b> |
| <b>ACE</b> | 15 (25.4%)  | 19 (32.2%)    | 0.767       |

AWE: Aneurysm wall enhancement, ACE: Aneurysm central enhancement, aSAH: aneurysmal subarachnoid haemorrhage
